# Supplementary material for: Investigating the Role of the Catalyst within Resorcinol–Formaldehyde Gel Synthesis
Source: MDPI journal article supplement (doi:10.3390/gels7030142), 2021-09-15
Supplement: s1 [file s1]

## Supplementary Materials

# Investigating the Role of the Catalyst Within Resorcinol–Formaldehyde Gel Synthesis

Elisha Martin, Martin Prostredny and Ashleigh Fletcher \*

Department of Chemical and Process Engineering, University of Strathclyde, Glasgow G1 1XJ, UK; elisha.martin@strath.ac.uk (E.M.); martin.prostredny@strath.ac.uk (M.P.)

\* Correspondence: ashleigh.fletcher@strath.ac.uk; Tel.: +44-(0)141-548-2431

### Gel Synthesis Data for the Investigation of the Cation Role

**Table S1.** Initial Solution Composition for  $\text{Na}_2\text{CO}_3$  Gels. R/C ratio is the resorcinol/catalyst molar ratio.

| R/C Ratio | Resorcinol (g) | Formaldehyde (g) | $\text{Na}_2\text{CO}_3$ (g) |
|-----------|----------------|------------------|------------------------------|
| 100       | 7.7170         | 4.2087           | 0.07428                      |
| 200       | 7.7409         | 4.3318           | 0.03726                      |
| 300       | 7.7490         | 4.2262           | 0.02486                      |
| 400       | 7.7530         | 4.2284           | 0.01866                      |
| 500       | 7.7554         | 4.2297           | 0.01493                      |
| 600       | 7.7570         | 4.2306           | 0.01244                      |

**Table S2.** Initial Solution Composition for  $\text{Na}_2\text{CO}_3/\text{NaHCO}_3$  Mixture Gels—R/C100 Equivalent. R/C ratio is the resorcinol/catalyst molar ratio.

| $\text{Na}_2\text{:NaH Na}^+$<br>Source Ratio | Resorcinol (g) | Formaldehyde (g) | $\text{Na}_2\text{CO}_3$ (g) | $\text{NaHCO}_3$ (g) |
|-----------------------------------------------|----------------|------------------|------------------------------|----------------------|
| 100:0                                         | 7.7170         | 4.2087           | 0.07428                      | -                    |
| 75:25                                         | 7.7030         | 4.2049           | 0.05566                      | 0.02941              |
| 50:50                                         | 7.6961         | 4.2011           | 0.03707                      | 0.05877              |
| 25:75                                         | 7.6961         | 4.1973           | 0.01852                      | 0.08807              |
| 0:100                                         | 7.6891         | 4.1935           | -                            | 0.11733              |

**Table S3.** Initial Solution Composition for  $\text{Na}_2\text{CO}_3/\text{NaHCO}_3$  Mixture Gels—R/C300 Equivalent. R/C ratio is the resorcinol/catalyst molar ratio.

| $\text{Na}_2\text{:NaH Na}^+$<br>Source Ratio | Resorcinol (g) | Formaldehyde (g) | $\text{Na}_2\text{CO}_3$ (g) | $\text{NaHCO}_3$ (g) |
|-----------------------------------------------|----------------|------------------|------------------------------|----------------------|
| 100:0                                         | 7.7490         | 4.2262           | 0.02486                      | -                    |
| 75:25                                         | 7.7466         | 4.2249           | 0.01864                      | 0.00985              |
| 50:50                                         | 7.7443         | 4.2236           | 0.01242                      | 0.01969              |
| 25:75                                         | 7.7419         | 4.2223           | 0.00621                      | 0.02953              |
| 0:100                                         | 7.7396         | 4.2211           | -                            | 0.03937              |

**Table S4.** Initial Solution Composition for NaHCO<sub>3</sub>/NH<sub>4</sub>CO<sub>3</sub> Mixture Gels—R/C100 Equivalent. R/C ratio is the resorcinol/catalyst molar ratio.

| NaH:NH <sub>4</sub> HCO <sub>3</sub> <sup>-</sup><br>Source Ratio | Resorcinol (g) | Formaldehyde (g) | NaHCO <sub>3</sub> (g) | NH <sub>4</sub> HCO <sub>3</sub> (g) |
|-------------------------------------------------------------------|----------------|------------------|------------------------|--------------------------------------|
| 100:0                                                             | 7.7269         | 4.2141           | 0.05895                | -                                    |
| 75:25                                                             | 7.7275         | 4.2144           | 0.04422                | 0.01387                              |
| 50:50                                                             | 7.7280         | 4.2148           | 0.02948                | 0.02774                              |
| 25:75                                                             | 7.7286         | 4.2151           | 0.01474                | 0.04162                              |
| 0:100                                                             | 7.7291         | 4.2154           | -                      | 0.05549                              |

**Table S5.** Initial Solution Composition for NaHCO<sub>3</sub>/NH<sub>4</sub>CO<sub>3</sub> Mixture Gels—R/C300 Equivalent. R/C ratio is the resorcinol/catalyst molar ratio.

| NaH:NH <sub>4</sub> HCO <sub>3</sub> <sup>-</sup><br>Source Ratio | Resorcinol (g) | Formaldehyde (g) | NaHCO <sub>3</sub> (g) | NH <sub>4</sub> HCO <sub>3</sub> (g) |
|-------------------------------------------------------------------|----------------|------------------|------------------------|--------------------------------------|
| 100:0                                                             | 7.7523         | 4.2280           | 0.01972                | -                                    |
| 75:25                                                             | 7.7525         | 4.2281           | 0.01479                | 0.00464                              |
| 50:50                                                             | 7.7527         | 4.2282           | 0.00986                | 0.00928                              |
| 25:75                                                             | 7.7529         | 4.2283           | 0.00493                | 0.01392                              |
| 0:100                                                             | 7.7530         | 4.2284           | -                      | 0.01855                              |

### Gel Synthesis Data for the Investigation of the Anion Role

**Table S6.** RF gel solution compositions for study of sodium chloride as additional source of sodium ions. Numbers in sample name correspond to R/C ratios of catalyst salts, INF represents infinite R/C ratio (zero concentration). R/C ratio is the resorcinol/catalyst molar ratio.

| Sample Name                                  | Resorcinol (g) | Formaldehyde (g) | Na <sub>2</sub> CO <sub>3</sub> (g) | NaCl (g) |
|----------------------------------------------|----------------|------------------|-------------------------------------|----------|
| Na <sub>2</sub> CO <sub>3</sub> 200 NaCl 200 | 7.7409         | 4.2218           | 0.03726                             | 0.04083  |
| Na <sub>2</sub> CO <sub>3</sub> 400 NaCl 133 | 7.7530         | 4.2284           | 0.01866                             | 0.06134  |
| Na <sub>2</sub> CO <sub>3</sub> 600 NaCl 120 | 7.7570         | 4.2306           | 0.01244                             | 0.06819  |
| Na <sub>2</sub> CO <sub>3</sub> INF NaCl 100 | 7.7651         | 4.2349           | -                                   | 0.08191  |

**Table S7.** RF gel solution compositions for study of sodium sulphate as additional source of sodium ions. numbers in sample name correspond to R/C ratios of catalyst salts, INF represents infinite R/C ratio (zero concentration). R/C ratio is the resorcinol/catalyst molar ratio.

| Sample Name                                                             | Resorcinol (g) | Formaldehyde (g) | Na <sub>2</sub> CO <sub>3</sub> (g) | Na <sub>2</sub> SO <sub>4</sub> (g) |
|-------------------------------------------------------------------------|----------------|------------------|-------------------------------------|-------------------------------------|
| Na <sub>2</sub> CO <sub>3</sub> 200 Na <sub>2</sub> SO <sub>4</sub> 200 | 7.7089         | 4.2043           | 0.03710                             | 0.04972                             |
| Na <sub>2</sub> CO <sub>3</sub> 400 Na <sub>2</sub> SO <sub>4</sub> 133 | 7.7048         | 4.2021           | 0.01854                             | 0.07454                             |
| Na <sub>2</sub> CO <sub>3</sub> 600 Na <sub>2</sub> SO <sub>4</sub> 120 | 7.7035         | 4.2014           | 0.01236                             | 0.08281                             |
| Na <sub>2</sub> CO <sub>3</sub> INF Na <sub>2</sub> SO <sub>4</sub> 100 | 7.7008         | 4.1999           | -                                   | 0.09934                             |

### Additional Information

The tables above include the mass of formaldehyde (F) used within the RF gel reaction, added to the system as Formalin solution (37 wt% formaldehyde in water and methanol, Sigma-Aldrich, Poole, UK). To calculate the volume of formalin to be added to meet the required mass of F for an R/F molar ratio of 0.5 (in line with the stoichiometry of the RF reaction), the approximate mass of F per ml of Formalin was first calculated:

$$\begin{aligned}
 & \text{Mass of F per Volume of Formalin (g/ml)} \\
 &= \text{Density of Formalin (g/ml)} \times 37\% \text{ (wt\% of F in Formalin)} \\
 &= 1.09 \text{ g/ml} \times 37\%
 \end{aligned}$$

$$= 0.4033 \text{ g of F per ml of Formalin (g/ml)}$$

The volume of Formalin added to each gel, therefore, was simply calculated from:

$$\text{Volume of Formalin Required (ml)} = \frac{\text{Mass of F Required for R/F Molar Ratio (g)}}{0.4033 \text{ g of F per ml of Formalin (g/ml)}}$$
